# Supplementary material for: Exploring adsorption behavior of sulfur and nitrogen compounds on transition metal-doped Cu(100) surfaces: insights from DFT and MD simulations
Source: Royal Society of Chemistry journal article supplement (doi:10.1039/d3cp04379g), 2023-01-01
Supplement: d3cp04379g1.pdf [file d3cp04379g1.pdf]

# **Electronic Supplementary Information (ESI): Exploring Adsorption Behavior of Sulfur and Nitrogen Compounds on Transition Metal-Doped Cu (100) Surfaces: Insights from DFT and MD Simulations**

Achraf Benbella,<sup>\*,†</sup> Hicham Jabraoui,<sup>\*,‡</sup> Imane Matrane,<sup>†</sup> and M'hammed  
Mazroui<sup>†</sup>

<sup>†</sup>*Laboratoire de Physique de la Matière Condensée, Faculté des Sciences Ben M'sik, Hassan*

*II University of Casablanca, Casablanca B.P. 7955, Morocco*

<sup>‡</sup>*LAAS-CNRS, University of Toulouse, 31077 Toulouse, France*

E-mail: [achf1995@gmail.com](mailto:achf1995@gmail.com); [hicham.jabraoui@laas.fr](mailto:hicham.jabraoui@laas.fr) & [hicham.jabraoui@gmail.com](mailto:hicham.jabraoui@gmail.com)

## Additional computational analysis

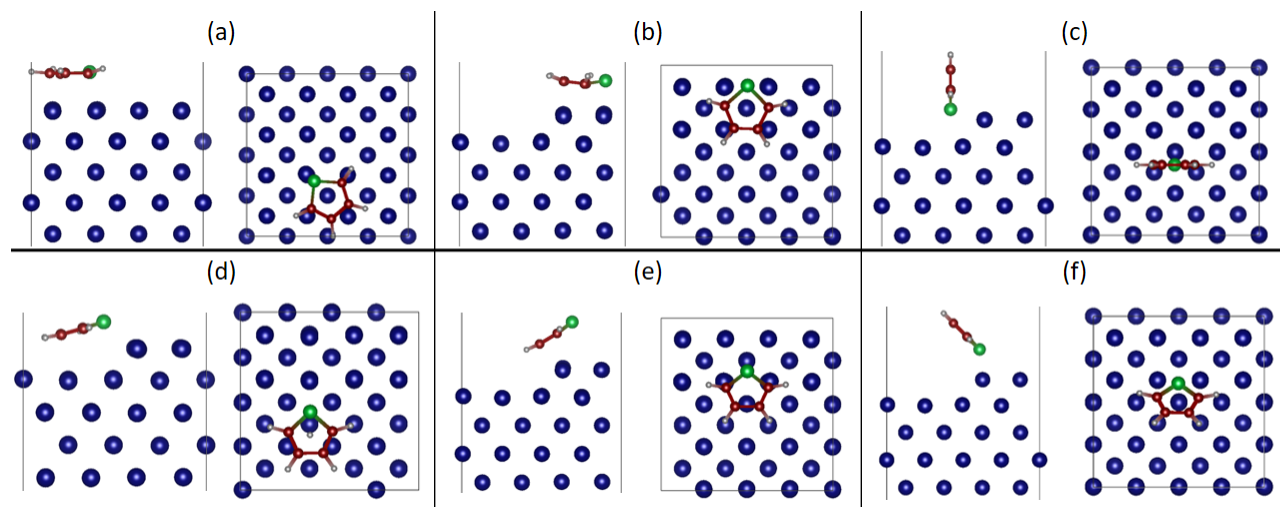

Figure S1: Top and side views of configurations for adsorption of thiophene on perfect (a) and defective Cu (100) surface: (b) f-upper terrace, (c) v-lower terrace, (d) f-lower terrace, (e) f-step, and (f) inclined configuration.

Blue, green, grey, and dark red balls represent copper, sulfur, hydrogen, and carbon atoms, respectively.

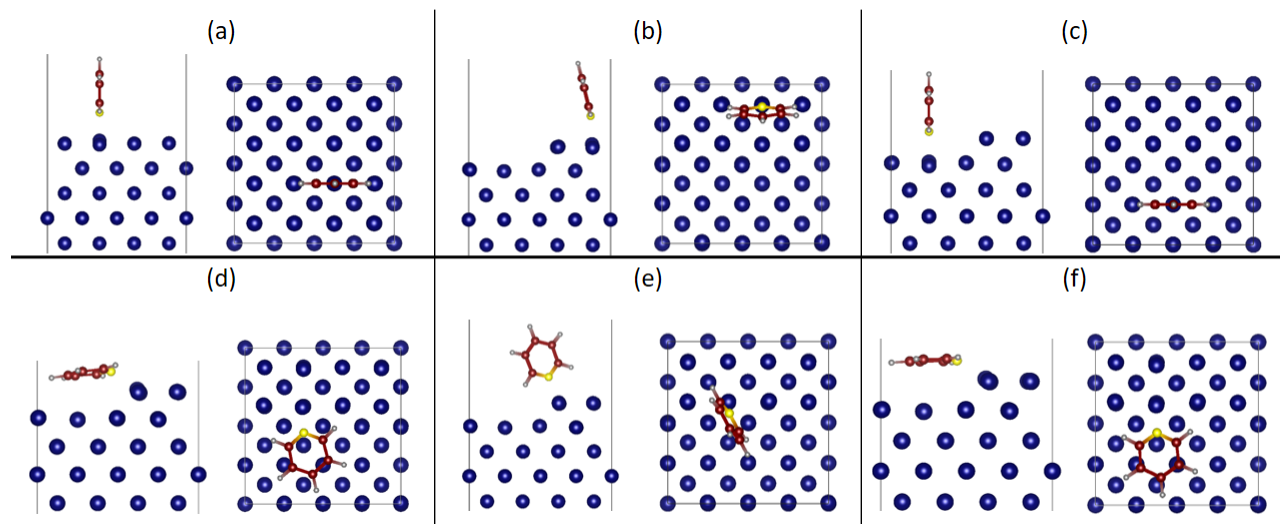

Figure S2: Top and side views of configurations for adsorption of pyridine on perfect (a) and stepped Cu (100) surface: (b) v-upper terrace, (c) v-lower terrace, (d) f-lower terrace, (e) v-step, and (f) inclined configuration.

Blue, yellow, grey, and dark red balls represent copper, nitrogen, hydrogen, and carbon atoms, respectively.

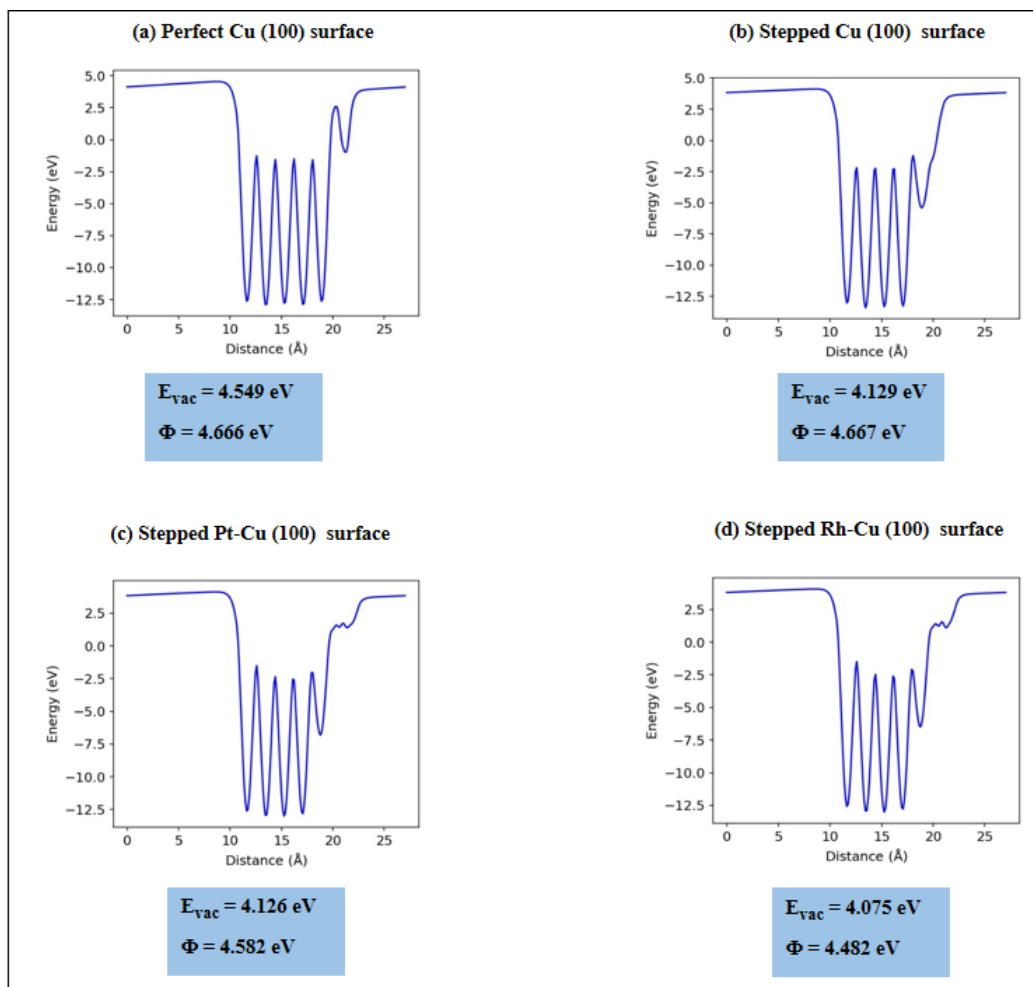

Figure S3: Planar-averaged electrostatic potential variation of adsorbed thiophene on the perfect and stepped Cu (100) surface. The distance (Å) indicates the position of surface layers and thiophene molecule along the Z direction (vacuum direction).

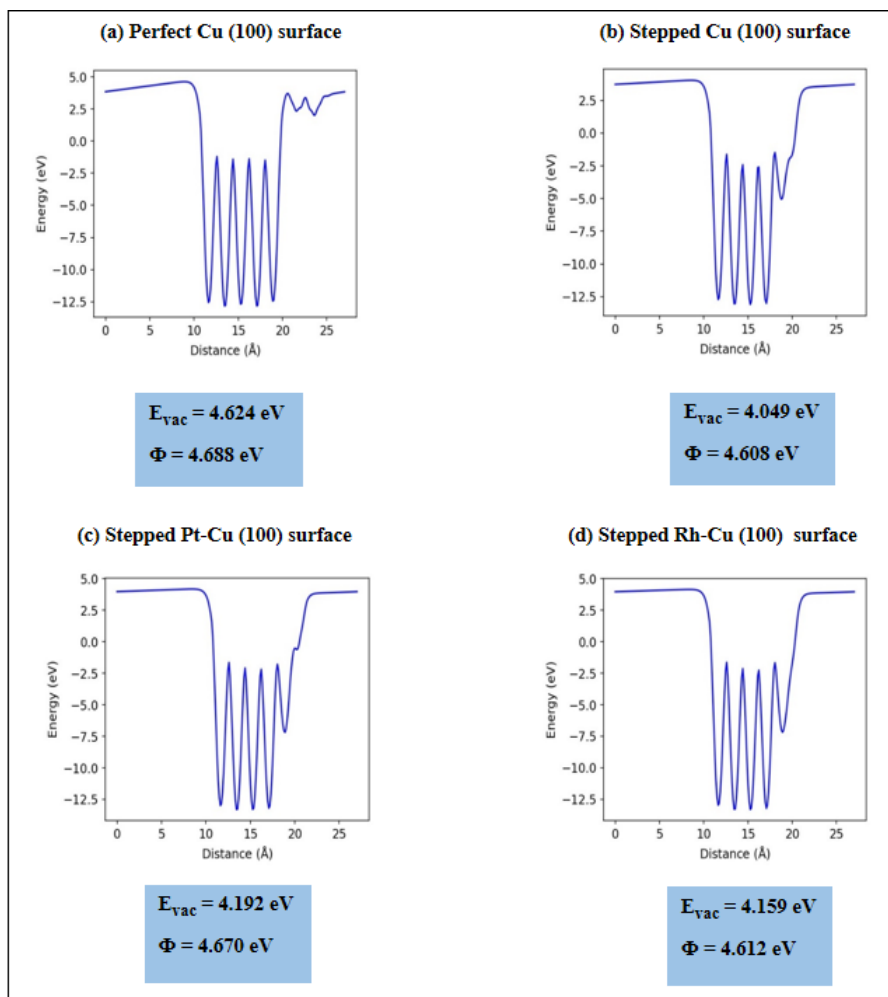

Figure S4: Planar-averaged electrostatic potential variation of adsorbed pyridine on the perfect and stepped Cu (100) surface. The distance (Å) indicates the position of surface layers and pyridine molecule along the Z direction (vacuum direction).

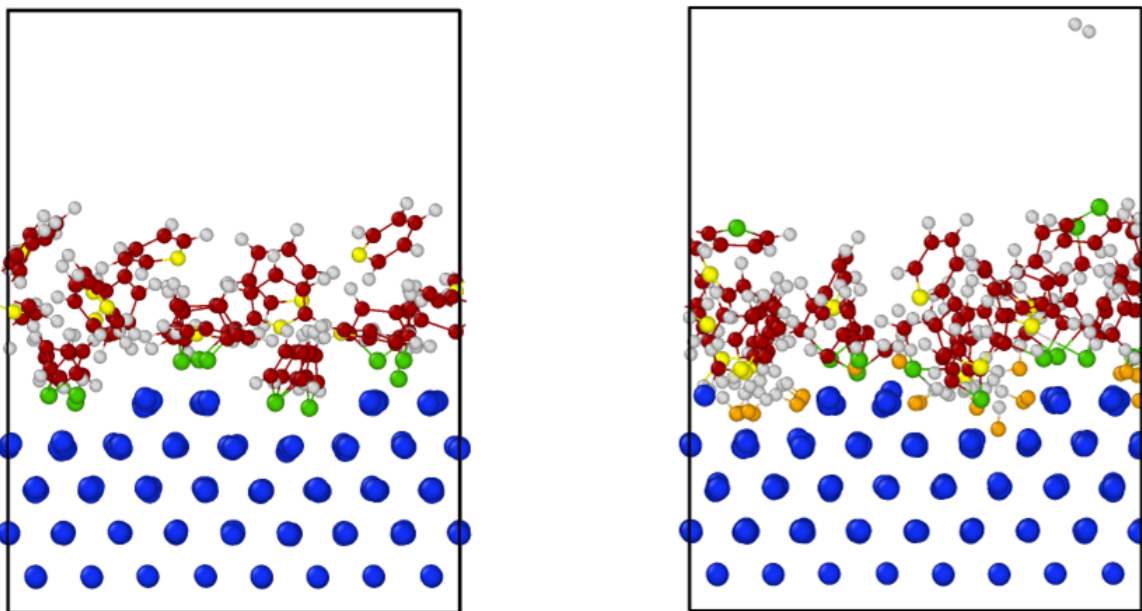

Figure S5: Full system of mixed adsorbate with (right) and without (left) water molecules. Blue, green, white, yellow, orange, and dark red balls represent Cu, S, H, N, O, and C atoms, respectively.

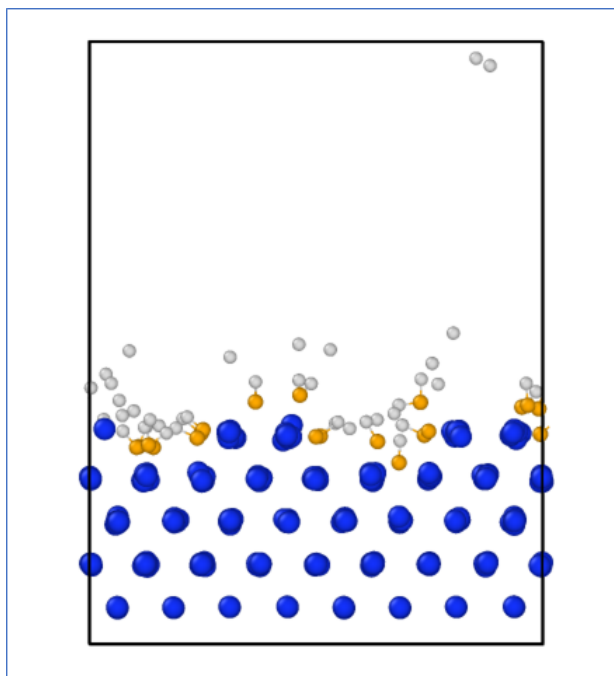

Figure S6: Water molecules adsorbed on Cu (100) stepped surface. Blue, white, and orange balls represent Cu, H, and O respectively.
