# Supplementary material for: Exploring adsorption behavior of sulfur and nitrogen compounds on transition metal-doped Cu(100) surfaces: insights from DFT and MD simulations
Source: Royal Society of Chemistry journal article supplement (doi:10.1039/d3cp04379g), 2023-01-01
Supplement: d3cp04379g2.zip [file d3cp04379g2.zip]

**(a) Perfect Cu (100) surface**

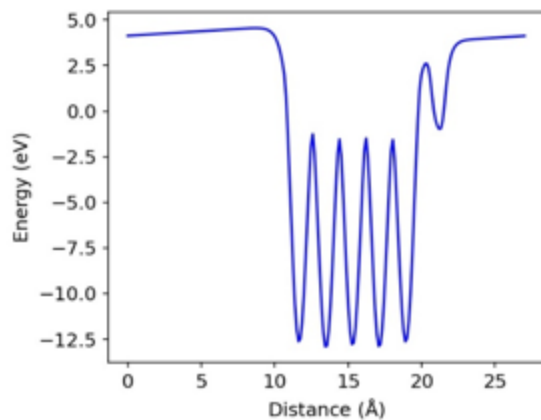

$$E_{\text{vac}} = 4.549 \text{ eV}$$

$$\Phi = 4.666 \text{ eV}$$

**(b) Stepped Cu (100) surface**

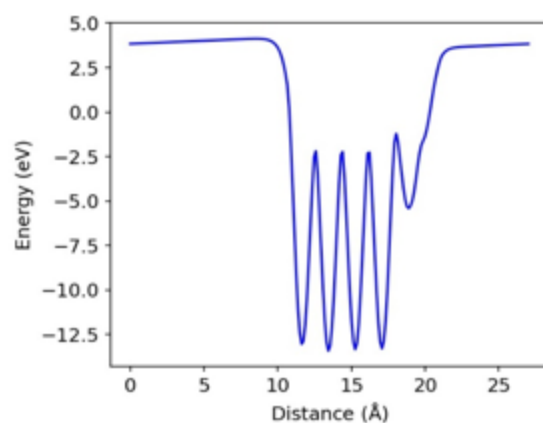

$$E_{\text{vac}} = 4.129 \text{ eV}$$

$$\Phi = 4.667 \text{ eV}$$

**(c) Stepped Pt-Cu (100) surface**

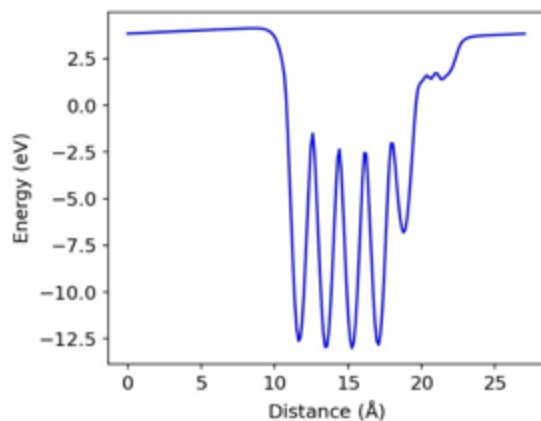

$$E_{\text{vac}} = 4.126 \text{ eV}$$

$$\Phi = 4.582 \text{ eV}$$

**(d) Stepped Rh-Cu (100) surface**

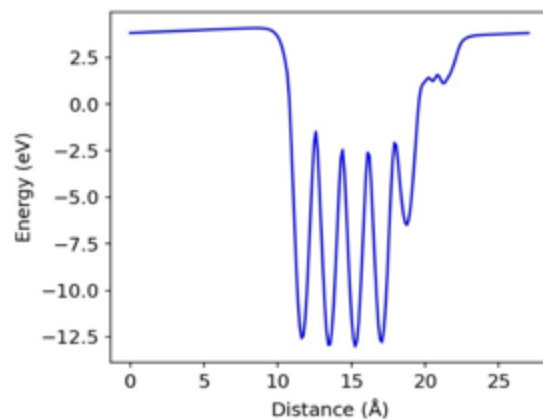

$$E_{\text{vac}} = 4.075 \text{ eV}$$

$$\Phi = 4.482 \text{ eV}$$
