# Supplementary figures and images for: Exploring adsorption behavior of sulfur and nitrogen compounds on transition metal-doped Cu(100) surfaces: insights from DFT and MD simulations
Source: Royal Society of Chemistry journal article supplement (doi:10.1039/d3cp04379g), 2023-01-01

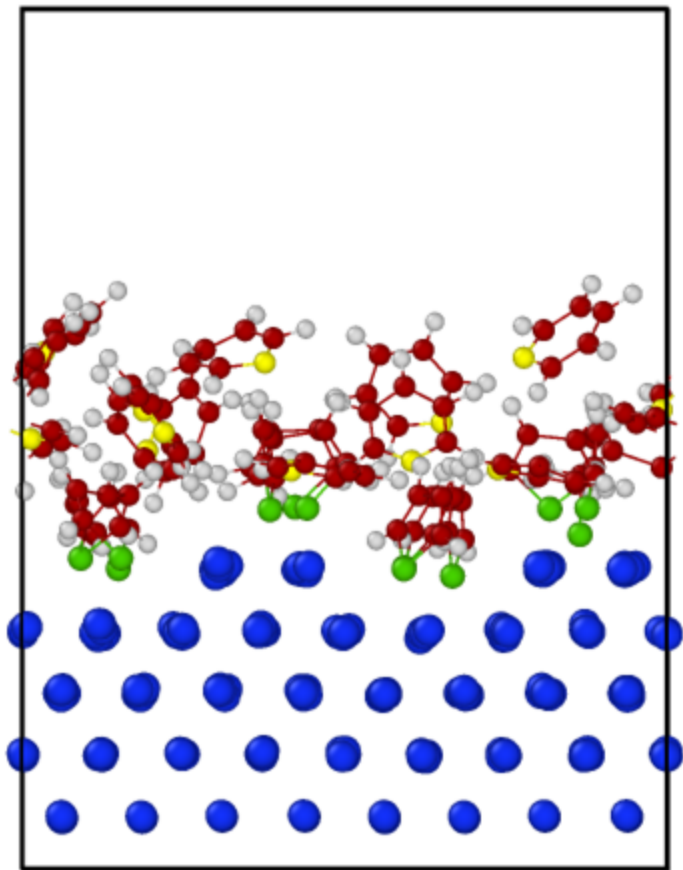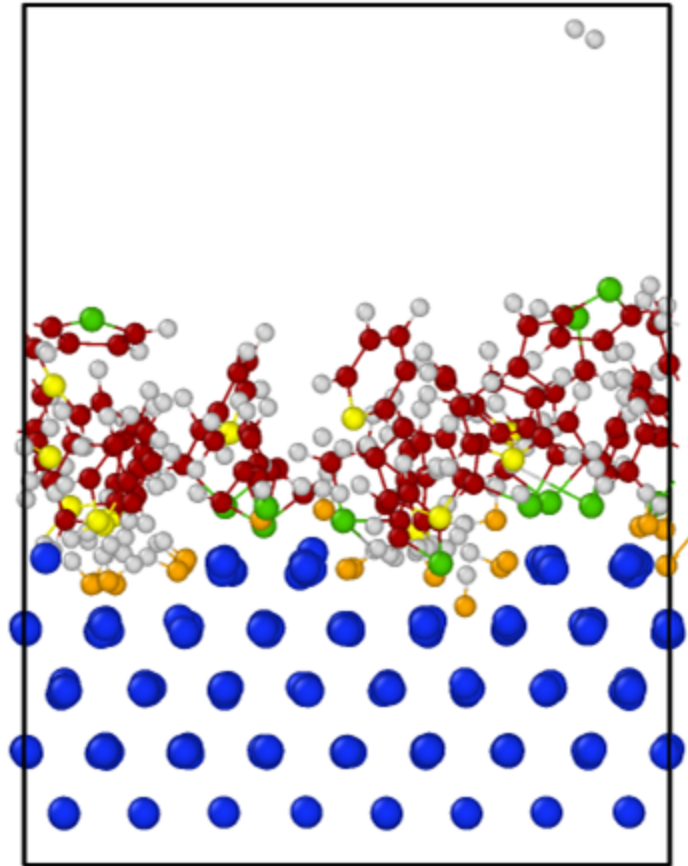

Supplement: d3cp04379g2.zip [file d3cp04379g2.zip]

(a)

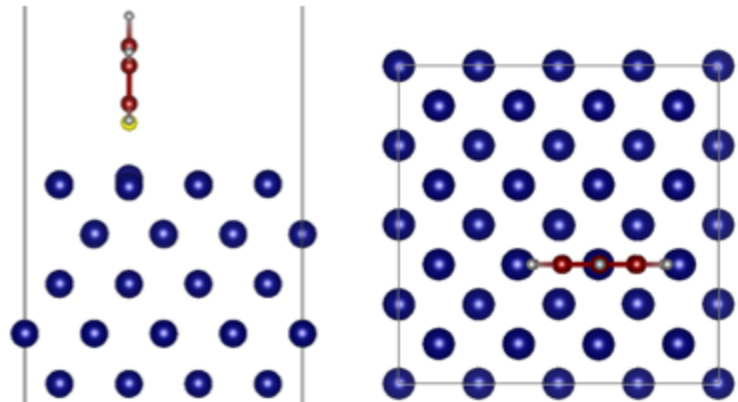

(b)

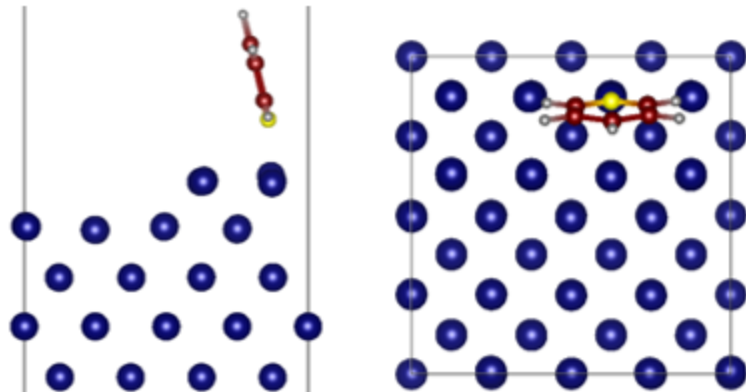

(c)

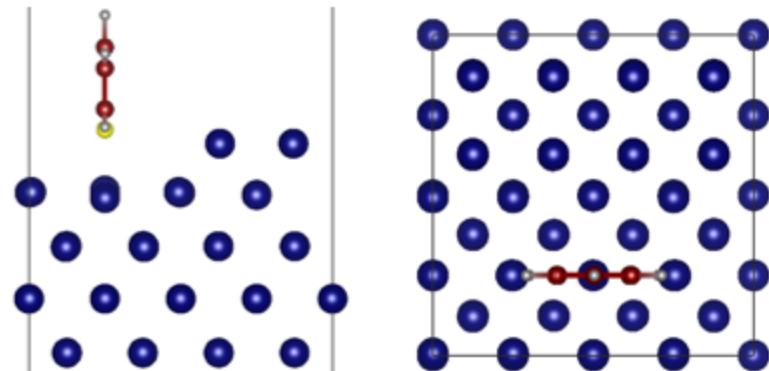

(d)

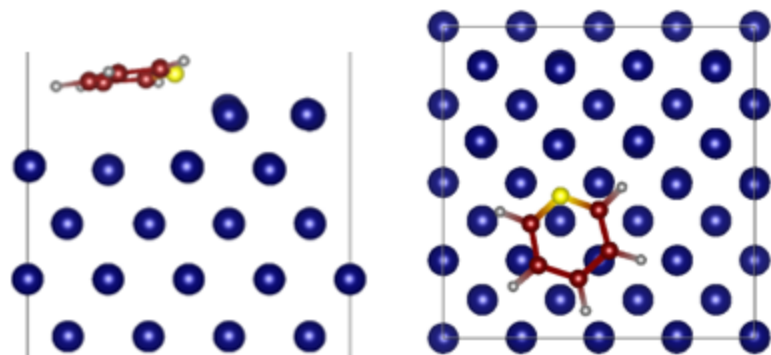

(e)

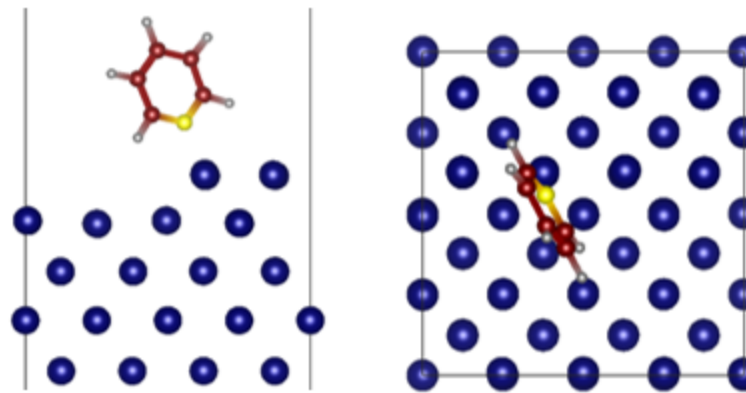

(f)

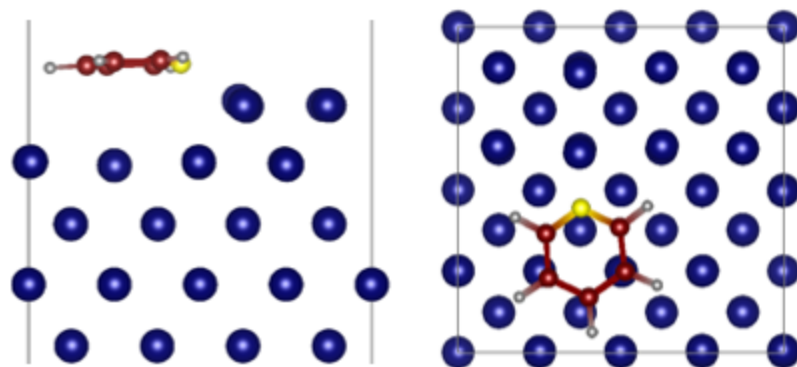

Supplement: d3cp04379g2.zip [file d3cp04379g2.zip]

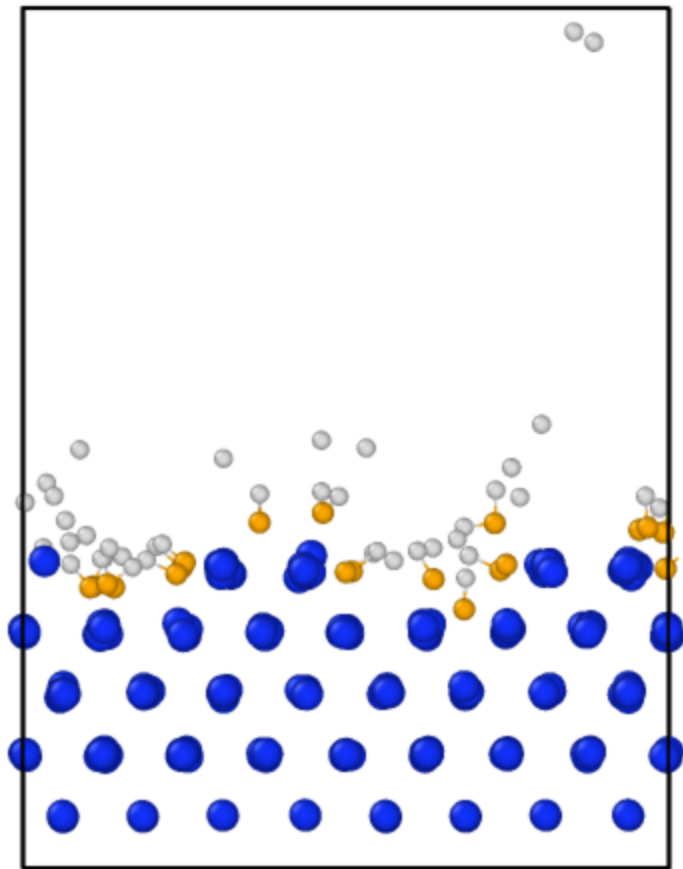

Supplement: d3cp04379g2.zip [file d3cp04379g2.zip]

(a)

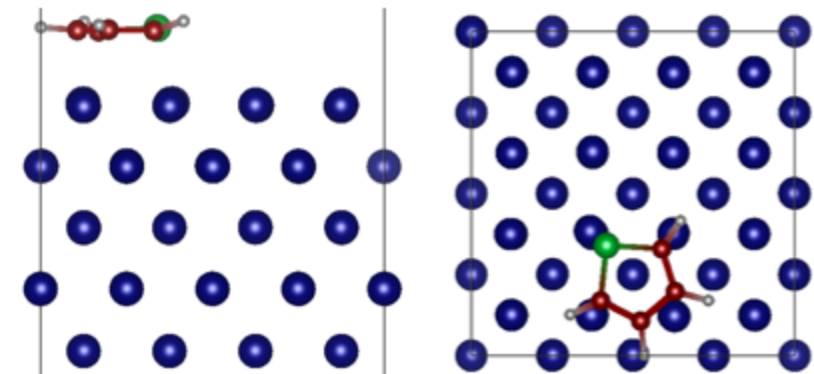

(b)

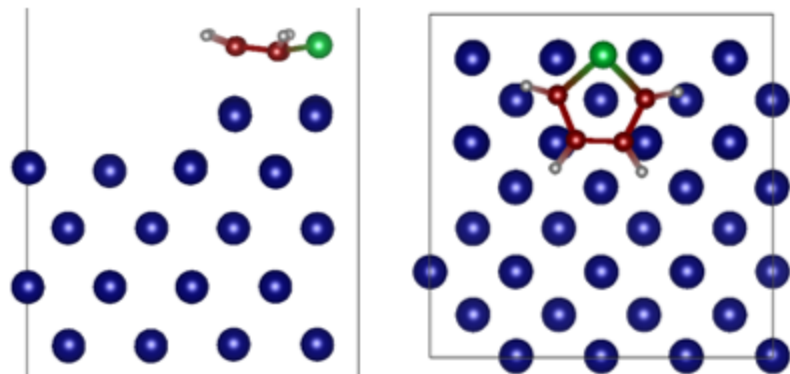

(c)

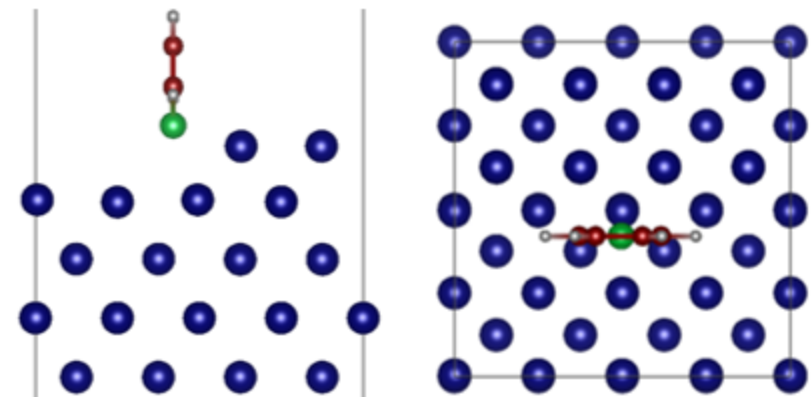

(d)

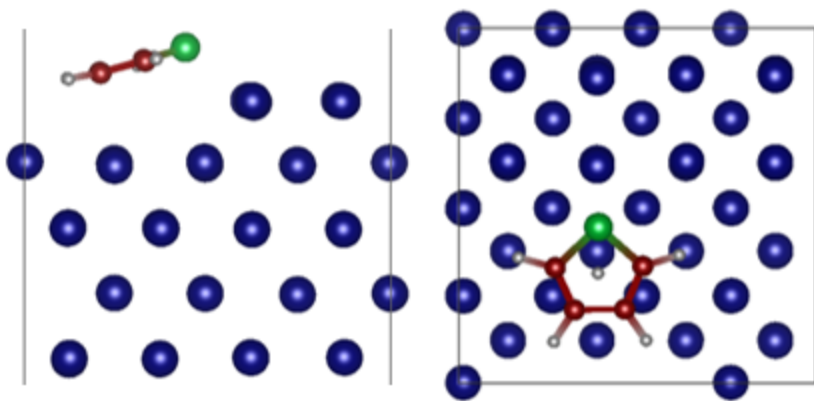

(e)

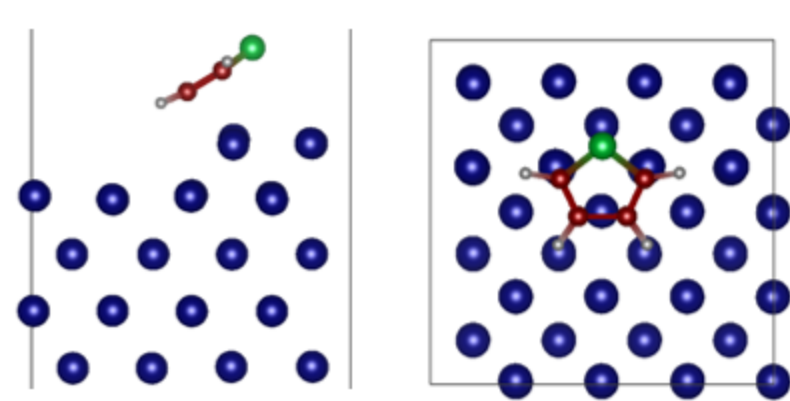

(f)

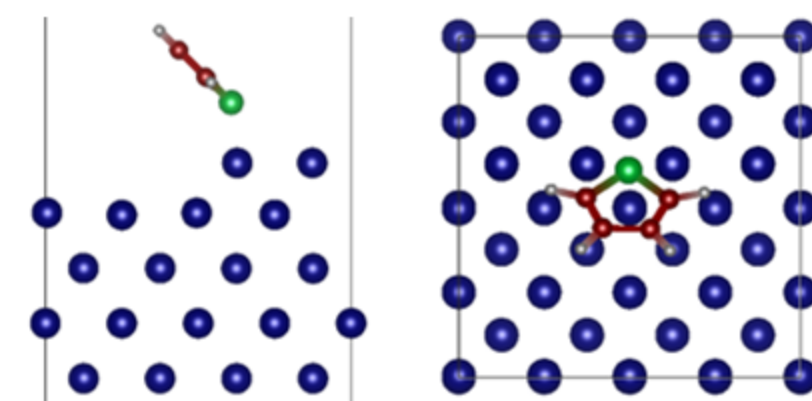

Supplement: d3cp04379g2.zip [file d3cp04379g2.zip]
